# Supplementary material
Source: publisher site journal article supplement (https://www.dovepress.com/article/416946)
Supplement: Supplementary file 1 [file get_supplementary_file.php]

**Supplementary Table S1: List of primers used in this study**

| Purpose                | Gene              | Sequence (5'-3')                             |                                           |
|------------------------|-------------------|----------------------------------------------|-------------------------------------------|
|                        |                   | Forward                                      | Reverse                                   |
| qRT-PCR                | HOXA-AS1          | CTCCCCACCGTTCAATGA                           | CCAGTCTCCAGGTCAATAACTAA                   |
|                        | HOXA-AS2          | CTGAACCAGGAATTGTCTC                          | GCTTCTGCTGTTTATTTGTC                      |
|                        | HOXA-AS3          | CAAAGGCACAGAATCTCAAC                         | CCACTTGCTCACACTCTAT                       |
|                        | HOXA-AS4          | CCAGTAAGCCAAAGTCAAG                          | TGCTGTGCTGTGTTAATC                        |
|                        | HOXA-AS5          | ACATCCGAGGAGACTTCT                           | CAATGTCACAGCCTTACG                        |
|                        | HOXA-AS6          | TGAAAGAGGAAGATTTATGTTACT                     | CACTAAGGACTGAGGTATGT                      |
|                        | HOXB-AS1          | CGGAAGAGGATTGTGAAGT                          | CCCAAATTAACACACCTTACAT                    |
|                        | HOXB-AS2          | TTGTAAAGTGGGAATTGCTAAT                       | CAGTGTCTATGCGAGTCT                        |
|                        | HOXB-AS3          | CCTCCAAGTCCAGTAAGA                           | TTCAAGCGAAGTCTACCT                        |
|                        | HOXB-AS4          | GCAACAAGAGAGGAGTCAAG                         | GTAGAGCACAAGCCATCAG                       |
|                        | HOXB-AS5          | CCGCCTTCTTCTCCATTCG                          | GATGTCGCCTGCCATTCG                        |
|                        | HOXC-AS1          | GAAAATGCCAGTCCCCGAAG                         | AGTGTGCGAGAGATGGAGTTG                     |
|                        | HOXC-AS2          | ACTGAGTTCTCTTGGCCTG                          | CGGGCTCGTATTGTCTCTC                       |
|                        | HOXC-AS3          | GTAACAGCGCCATCTAGCA                          | GATACGTGACTCCTCCAACT                      |
|                        | HOXC-AS4          | CAGTGGGGAAGTCTGACTCG                         | GTGCCTGGTCTCTCTTACC                       |
|                        | HOXC-AS5          | GAGCAAATGGACAGGTCTG                          | TACAACCTCGGCTGGTCTTC                      |
|                        | HOXD-AS1          | TGTTCCACCAGAAGATTAGAAGTT                     | AGCCCACGCATCTCTATTTG                      |
|                        | HOXD-AS2          | AACTGCTCTGGTGAATCC                           | TTCTTGTCTCTCTGCTTCC                       |
|                        | MALAT1            | TCGTTTGCCTCAGACAGGTA                         | GCTCCCAGATGAAATGAAGC                      |
|                        | HULC              | ATCTGCAAGCCAGGAAGAGTC                        | CTTGCTTGATGCTTTGGTCTGT                    |
|                        | SOCS1             | TTCGCCCTTAGCGTGAAGATGG                       | TAGTGTCCAGCAGCTCGAAGA                     |
|                        | ATF3              | CGCTGGAATCAGTCACTGTGAG                       | CTTGTTTCGGCACTTTGCAGCTG                   |
|                        | CDKN1C            | AGATCAGCGCTGAGAAGTCGT                        | TCGGGGCTCTTTGGGCTCTAAA                    |
|                        | BATF2             | GCTGAAGAAGCAGAAGAACCGG                       | TGCAGGGACTGGATCTCCTTCC                    |
|                        | PRICKLE1          | GCAGAACTGCTCAAACACCGGT                       | CAGGACCGTTTCACACTCAAGG                    |
|                        | AKR1C3            | CCGAAGCAAGATTGCAGATGGC                       | GTGAGTTTTCCAAGGCTGGTCG                    |
|                        | TGFBR2            | GTCTGTGGATGACCTGGCTAAC                       | GACATCGGTCTGCTTGAAGGAC                    |
|                        | NOTCH2            | GTGCCTATGTCCATCTGGATGG                       | AGACACCTGAGTGTGGCACA                      |
|                        | SMYD3             | TTCACCATCTGTAATGCGGAGA                       | ACACAATCGAACAGTTGGGGT                     |
|                        | β-ACTIN           | TGGCACCCAGCACAATGAA                          | CTAAGTCATAGTCCGCCTAGAAGCA                 |
| Promoter amplification | HOXD-AS2 promoter | GCGTGCTAGCCCGGGCTCGAGCTGAACATAGAGCTTGGCCATCA | CAGTACCGGAATGCCAAGCTTGGTAAGAATCGCCCCCTCCC |
|                        | SMYD3 promoter    | ATTTCTCTATCGATAGGTACCACAAGCTTCCATCCTCATTTTAT | TACTTAGATCGCAGACTCGAGTTGGCGGTTGCGAACTTTTC |
| ORF amplification      | SMYD3             | TATTTCCGGTGAATTCGGGTAGCCGTCTGAGGTGC          | GAGAGGGGGCGGATCCATTCAACAAAGACACACGCGG     |
| ChIP-qPCR              | Primer 1          | GGGAAATGTAGGGGAGCAG                          | GCAGCCTTCGGGTAAAGAATC                     |
|                        | Primer 2          | TACTGCCCCCTTAGACTTCTG                        | GTCGCTGTCTAAGCCCCTTC                      |

**Supplementary Table S2: List of primary antibodies used in this study**

| <b>Name of Antibody</b>             | <b>Manufacturer and catalog No.</b>    | <b>Dilution</b> |
|-------------------------------------|----------------------------------------|-----------------|
| anti-Cyclin A                       | Abcam, ab185619                        | 1:1000, WB      |
| anti-Cyclin B1                      | Abcam, ab32053                         | 1: 5000, WB     |
| anti-Cyclin D1                      | Abcam, ab134175                        | 1: 20000, WB    |
| anti-Cyclin E1                      | Abcam, ab33911                         | 1: 5000, WB     |
| anti-MMP1                           | Abcam, ab134184                        | 1: 1000, WB     |
| anti-MMP2                           | Abcam, ab92536                         | 1: 1000, WB     |
| anti-MMP9                           | Abcam, ab137867                        | 1: 1000, WB     |
| anti-MEK1/2                         | Cell Signaling Technology (CST), 8727T | 1: 1000, WB     |
| anti-Phospho-MEK1/2 (Ser217/221)    | Cell Signaling Technology (CST), 9154T | 1: 1000, WB     |
| anti-Erk1/2                         | Cell Signaling Technology (CST), 4695T | 1: 1000, WB     |
| anti-Phospho-Erk1/2 (Thr202/Tyr204) | Cell Signaling Technology (CST), 4370T | 1: 1000, WB     |
| anti-H3K4me3                        | Abcam, ab8580                          | 1: 2000, WB     |
| anti-H3K4me2                        | Cell Signaling Technology (CST), 9725T | 1: 1000, WB     |
| anti-GAPDH                          | Cell Signaling Technology (CST), 5174  | 1: 1000, WB     |
| anti-Histone H3                     | Cell Signaling Technology (CST), 4499T | 1: 2000, WB     |
| anti-Ki67                           | Santa cruz, sc-23900                   | 1: 200, IHC     |
| anti-PCNA                           | Proteintech, 10205-2-AP                | 1: 500, IHC     |

**Supplementary Table S3: Clinical characteristics of HCC patients from TCGA database used in this study**

| Clinical characteristic                     | Levels    | Number of patients (%) |
|---------------------------------------------|-----------|------------------------|
| Total                                       |           | 374                    |
| Gender                                      | Female    | 121 (32.4%)            |
|                                             | Male      | 253 (67.6%)            |
| Age                                         | <=60      | 177 (47.5%)            |
|                                             | >60       | 196 (52.5%)            |
| T stage                                     | T1        | 183 (49.3%)            |
|                                             | T2        | 95 (25.6%)             |
|                                             | T3        | 80 (21.6%)             |
|                                             | T4        | 13 (3.5%)              |
| N stage                                     | N0        | 254 (98.4%)            |
|                                             | N1        | 4 (1.6%)               |
| M stage                                     | M0        | 268 (98.5%)            |
|                                             | M1        | 4 (1.5%)               |
| Pathologic stage                            | Stage I   | 173 (49.4%)            |
|                                             | Stage II  | 87 (24.9%)             |
|                                             | Stage III | 85 (24.3%)             |
|                                             | Stage IV  | 5 (1.4%)               |
| Histologic grade                            | G1        | 55 (14.9%)             |
|                                             | G2        | 178 (48.2%)            |
|                                             | G3        | 124 (33.6%)            |
|                                             | G4        | 12 (3.3%)              |
| AFP (ng/ml)                                 | <=400     | 215 (76.8%)            |
|                                             | >400      | 65 (23.2%)             |
| Albumin (g/dl)                              | <3.5      | 69 (23%)               |
|                                             | >=3.5     | 231 (77%)              |
| Prothrombin time, n (%)                     | <=4       | 208 (70%)              |
|                                             | >4        | 89 (30%)               |
| Child-Pugh grade, n (%)                     | A         | 219 (90.9%)            |
|                                             | B         | 21 (8.7%)              |
|                                             | C         | 1 (0.4%)               |
| Fibrosis ishak score, n (%)                 | 0         | 75 (34.9%)             |
|                                             | 1/2       | 31 (14.4%)             |
|                                             | 3/4       | 28 (13%)               |
|                                             | 5/6       | 81 (37.7%)             |
| Adjacent hepatic tissue inflammation, n (%) | None      | 118 (49.8%)            |
|                                             | Mild      | 101 (42.6%)            |
|                                             | Severe    | 18 (7.6%)              |
| Cirrhosis, n (%)                            | No        | 138 (63.6%)            |
|                                             | Yes       | 79 (36.4%)             |
| HBV positive, n (%)                         | No        | 49 (17.8%)             |
|                                             | Yes       | 226 (82.2%)            |
| HCV positive, n (%)                         | No        | 142 (50.9%)            |

| Clinical characteristic  | Levels | Number of patients (%) |
|--------------------------|--------|------------------------|
| Vascular invasion, n (%) | Yes    | 137 (49.1%)            |
|                          | No     | 208 (65.4%)            |
|                          | Yes    | 110 (34.6%)            |

**Supplementary Table S4: List of 233 differentially expressed genes between HOXD-AS2 knockdown and control Bel-7402 cells**

Absolute value of log2 fold change cut-off: 0.6; False discovery rate (FDR) cut-off: 0.05

Condition pairs: Negative control Bel-7402 cells(T01) vs HOXD-AS2 knockdown Bel-7402 cells (T03)

Column A: Gene ID

Column B: Gene Symbol

Column C and D: The value of reads count

Column E and F: The value of fragments per kilobase of transcript per million mapped reads (FPKM)

Column G: False discovery rate (FDR)

Column H: log2 fold change

Column I: Regulatory Trends. Up, up-regulation; Down, down-regulation.

| Gene ID         | Gene_symbol | T01_Count | T03_Count | T01_FPKM    | T03_FPKM    | FDR         | log2FC       | Regulated |
|-----------------|-------------|-----------|-----------|-------------|-------------|-------------|--------------|-----------|
| ENSG00000115361 | ACADL       | 24        | 2         | 0.554082    | 0.0666044   | 0.026570123 | -2.995345399 | Down      |
| ENSG00000170293 | CMTM8       | 31        | 3         | 1.815909    | 0.229702206 | 0.00213688  | -2.949389393 | Down      |
| ENSG00000157570 | TSPAN18     | 35        | 6         | 1.169275216 | 0.1951101   | 0.011911019 | -2.330327994 | Down      |
| ENSG00000184903 | IMMP2L      | 195       | 75        | 51.5574187  | 16.60933488 | 1.72E-08    | -1.353510944 | Down      |
| ENSG00000137474 | MYO7A       | 80        | 33        | 0.491630063 | 0.189977893 | 0.028500691 | -1.237578015 | Down      |
| ENSG00000163083 | INHBB       | 84        | 36        | 1.19153     | 0.52409     | 0.034377446 | -1.185447837 | Down      |
| ENSG00000167861 | HID1        | 185       | 85        | 5.176411644 | 2.076541743 | 2.62E-05    | -1.099954547 | Down      |
| ENSG00000088448 | ANKRD10     | 780       | 371       | 19.160489   | 9.105042    | 0           | -1.057906646 | Down      |
| ENSG00000169252 | ADRB2       | 155       | 74        | 2.53271     | 1.22143     | 0.00079097  | -1.043535908 | Down      |
| ENSG00000151632 | AKR1C2      | 2507      | 1219      | 150.6465176 | 69.31395945 | 0           | -1.027710781 | Down      |
| ENSG00000221955 | SLC12A8     | 210       | 102       | 4.537269668 | 1.760989101 | 3.29E-05    | -1.02188377  | Down      |
| ENSG00000140945 | CDH13       | 515       | 257       | 11.06692572 | 5.224243958 | 4.94E-11    | -0.987799026 | Down      |
| ENSG00000163513 | TGFBR2      | 1208      | 604       | 13.16979    | 6.576848    | 0           | -0.986793806 | Down      |
| ENSG00000157978 | LDLRAP1     | 1202      | 623       | 18.5087     | 9.67388     | 1.11E-16    | -0.93501529  | Down      |
| ENSG00000160179 | ABCG1       | 368       | 194       | 5.921714    | 3.066583535 | 4.80E-07    | -0.907868697 | Down      |
| ENSG00000082014 | SMARCD3     | 210       | 114       | 4.4870646   | 2.432547255 | 0.001614269 | -0.863078574 | Down      |
| ENSG00000090238 | YPEL3       | 198       | 108       | 11.18942064 | 6.319794947 | 0.00332926  | -0.855878498 | Down      |
| ENSG00000001084 | GCLC        | 2536      | 1407      | 39.079135   | 20.80064028 | 0           | -0.837549809 | Down      |
| ENSG00000185585 | OLFML2A     | 212       | 118       | 1.525610627 | 0.860169641 | 0.003363824 | -0.827405781 | Down      |
| ENSG00000156239 | N6AMT1      | 231       | 130       | 6.758325123 | 3.059247605 | 0.002186992 | -0.812136841 | Down      |
| ENSG00000100154 | TTC28       | 983       | 566       | 4.79917     | 2.562493    | 1.61E-10    | -0.783313002 | Down      |
| ENSG00000006756 | ARSD        | 248       | 145       | 3.739550894 | 3.026592831 | 0.004385185 | -0.757841427 | Down      |

|                 |           |       |      |             |             |             |              |      |
|-----------------|-----------|-------|------|-------------|-------------|-------------|--------------|------|
| ENSG00000158163 | DZIP1L    | 220   | 129  | 3.79717077  | 1.879691686 | 0.013045032 | -0.753144844 | Down |
| ENSG00000249992 | TMEM158   | 189   | 111  | 5.61992     | 3.45087     | 0.042568833 | -0.750030125 | Down |
| ENSG00000198270 | TMEM116   | 189   | 111  | 12.94758881 | 6.63888521  | 0.042568833 | -0.750030125 | Down |
| ENSG00000163412 | EIF4E3    | 277   | 165  | 4.344921651 | 2.916094104 | 0.003328961 | -0.731633996 | Down |
| ENSG00000132879 | FBXO44    | 276   | 165  | 7.780815041 | 5.298412781 | 0.003933105 | -0.726437628 | Down |
| ENSG00000280657 | SMYD3     | 777   | 468  | 25.834261   | 16.3394727  | 1.45E-07    | -0.718171162 | Down |
| ENSG00000128694 | OSGEPL1   | 268   | 163  | 8.960121718 | 5.189774386 | 0.009361819 | -0.701652868 | Down |
| ENSG00000122729 | ACO1      | 932   | 572  | 11.94588926 | 7.29943836  | 8.81E-08    | -0.691359591 | Down |
| ENSG00000107242 | PIP5K1B   | 448   | 275  | 8.037806384 | 4.838531831 | 0.000161018 | -0.689948774 | Down |
| ENSG00000129566 | TEP1      | 712   | 439  | 3.3631987   | 1.8921655   | 2.11E-06    | -0.684384805 | Down |
| ENSG00000196139 | AKR1C3    | 15903 | 9867 | 680.98193   | 427.8436189 | 1.49E-14    | -0.676679779 | Down |
| ENSG00000133195 | SLC39A11  | 294   | 182  | 16.61935588 | 6.231342201 | 0.008706963 | -0.676665002 | Down |
| ENSG00000118898 | PPL       | 1725  | 1071 | 9.715828541 | 6.269862725 | 5.81E-10    | -0.675196858 | Down |
| ENSG00000177570 | SAMD12    | 289   | 180  | 5.573907427 | 6.1446047   | 0.012399081 | -0.667857333 | Down |
| ENSG00000115468 | EFHD1     | 320   | 200  | 8.631321834 | 5.555039967 | 0.006565874 | -0.663206895 | Down |
| ENSG00000111181 | SLC6A12   | 442   | 278  | 7.64113159  | 4.513257254 | 0.000631256 | -0.654956164 | Down |
| ENSG00000074219 | TEAD2     | 549   | 346  | 12.9844619  | 7.5647452   | 0.000105547 | -0.652452567 | Down |
| ENSG00000206418 | RAB12     | 504   | 320  | 12.04937    | 7.721035    | 0.000336886 | -0.641655879 | Down |
| ENSG00000175806 | MSRA      | 681   | 435  | 26.061872   | 19.0380883  | 3.55E-05    | -0.633438526 | Down |
| ENSG00000134250 | NOTCH2    | 3637  | 2356 | 16.66602425 | 10.73787447 | 5.22E-10    | -0.614296163 | Down |
| ENSG00000173068 | BNC2      | 370   | 241  | 3.776233682 | 3.352857369 | 0.012052985 | -0.604312607 | Down |
| ENSG00000140265 | ZSCAN29   | 346   | 522  | 3.931323614 | 4.079176    | 0.000974273 | 0.603534096  | Up   |
| ENSG00000127774 | EMC6      | 951   | 1437 | 93.2899     | 143.6035    | 2.84E-07    | 0.606825533  | Up   |
| ENSG00000153879 | CEBPG     | 723   | 1099 | 9.711169    | 14.6717     | 1.40E-06    | 0.615211488  | Up   |
| ENSG00000185112 | FAM43A    | 226   | 345  | 4.14451     | 6.49944     | 0.011858232 | 0.619618854  | Up   |
| ENSG00000132109 | TRIM21    | 1152  | 1758 | 27.839126   | 42.64755    | 2.39E-08    | 0.621171001  | Up   |
| ENSG00000096654 | ZNF184    | 256   | 392  | 4.306071    | 6.38859     | 0.004141393 | 0.624337648  | Up   |
| ENSG00000108771 | DHX58     | 213   | 327  | 3.952304    | 7.259867628 | 0.013803262 | 0.627600704  | Up   |
| ENSG00000126226 | PCID2     | 1103  | 1692 | 33.78808075 | 50.15391309 | 1.87E-08    | 0.628646341  | Up   |
| ENSG00000055483 | USP36     | 2892  | 4436 | 28.91754023 | 45.4238925  | 5.37E-11    | 0.628865779  | Up   |
| ENSG00000005801 | ZNF195    | 1083  | 1665 | 26.90107372 | 35.25770321 | 1.70E-08    | 0.631826659  | Up   |
| ENSG00000138757 | G3BP2     | 2026  | 3127 | 34.97712102 | 51.11106119 | 1.40E-10    | 0.63773027   | Up   |
| ENSG00000158373 | HIST1H2BD | 337   | 523  | 29.95662    | 47.37443    | 0.000205821 | 0.64418671   | Up   |

|                 |           |       |       |             |             |             |             |    |
|-----------------|-----------|-------|-------|-------------|-------------|-------------|-------------|----|
| ENSG00000275183 | LENG9     | 307   | 478   | 6.89833     | 10.993      | 0.00037482  | 0.648714761 | Up |
| ENSG00000156374 | PCGF6     | 316   | 493   | 8.330011996 | 13.023799   | 0.000257674 | 0.651654134 | Up |
| ENSG00000103888 | CEMIP     | 939   | 1465  | 6.007709316 | 9.449718891 | 1.12E-08    | 0.652942736 | Up |
| ENSG00000086827 | ZW10      | 537   | 842   | 9.71476     | 15.0738     | 1.28E-06    | 0.659653127 | Up |
| ENSG00000163545 | NUAK2     | 376   | 590   | 5.23558     | 8.28248     | 3.64E-05    | 0.66025719  | Up |
| ENSG00000130803 | ZNF317    | 638   | 1003  | 7.967405    | 12.45676    | 1.90E-07    | 0.663620904 | Up |
| ENSG00000089335 | ZNF302    | 263   | 414   | 5.676202229 | 8.320204127 | 0.000740969 | 0.664145706 | Up |
| ENSG00000130589 | HELZ2     | 11476 | 18039 | 47.88082    | 77.4802     | 5.22E-14    | 0.664320913 | Up |
| ENSG00000180573 | HIST1H2AC | 760   | 1197  | 40.85269    | 69.82615    | 2.91E-08    | 0.666428703 | Up |
| ENSG00000138050 | THUMPD2   | 230   | 363   | 6.020769    | 9.233294942 | 0.001988059 | 0.667573599 | Up |
| ENSG00000136826 | KLF4      | 774   | 1224  | 14.6690094  | 21.7897012  | 1.61E-08    | 0.672283979 | Up |
| ENSG00000141682 | PMAIP1    | 701   | 1113  | 25.37413052 | 39.518562   | 2.85E-08    | 0.677965318 | Up |
| ENSG00000273542 | HIST1H4K  | 278   | 442   | 1.93549     | 3.06769     | 0.000251718 | 0.678625953 | Up |
| ENSG00000146674 | IGFBP3    | 2265  | 3597  | 48.943374   | 78.7212204  | 1.42E-12    | 0.678885741 | Up |
| ENSG00000156232 | WHAMM     | 352   | 566   | 3.34965     | 5.323678093 | 1.20E-05    | 0.695321919 | Up |
| ENSG00000113389 | NPR3      | 858   | 1379  | 10.78052383 | 19.00216192 | 9.97E-10    | 0.69571665  | Up |
| ENSG00000115963 | RND3      | 1198  | 1928  | 25.1212194  | 39.75162144 | 3.23E-11    | 0.697826897 | Up |
| ENSG00000126217 | MCF2L     | 138   | 223   | 1.961258613 | 3.134765856 | 0.034831374 | 0.699694512 | Up |
| ENSG00000258947 | TUBB3     | 607   | 983   | 11.728601   | 19.82208349 | 1.83E-08    | 0.706324547 | Up |
| ENSG00000173559 | NABP1     | 372   | 605   | 8.970551    | 14.451562   | 2.86E-06    | 0.711792557 | Up |
| ENSG00000170345 | FOS       | 235   | 383   | 7.542794883 | 10.49296686 | 0.000279879 | 0.713839324 | Up |
| ENSG00000003989 | SLC7A2    | 178   | 291   | 1.46066834  | 2.344085643 | 0.002962322 | 0.717414326 | Up |
| ENSG00000171100 | MTM1      | 135   | 221   | 3.436254983 | 3.885173533 | 0.025088607 | 0.718210002 | Up |
| ENSG00000111011 | RSRC2     | 1137  | 1874  | 18.58100668 | 31.8111566  | 2.52E-12    | 0.732189427 | Up |
| ENSG00000171700 | RGS19     | 236   | 390   | 7.34514     | 12.36128    | 0.000118637 | 0.733796426 | Up |
| ENSG00000160888 | IER2      | 2632  | 4348  | 61.31714    | 104.27458   | 1.44E-15    | 0.735817891 | Up |
| ENSG00000197019 | SERTAD1   | 366   | 608   | 8.96879     | 14.9694     | 6.49E-07    | 0.742302509 | Up |
| ENSG00000163312 | HELQ      | 129   | 215   | 3.030402    | 4.803504252 | 0.017787052 | 0.743733137 | Up |
| ENSG00000116761 | CTH       | 520   | 865   | 18.284863   | 30.30780423 | 8.08E-09    | 0.744792724 | Up |
| ENSG00000268043 | NBPF12    | 154   | 258   | 1.125113499 | 2.028422319 | 0.003334621 | 0.751999825 | Up |
| ENSG00000104825 | NFKBIB    | 448   | 751   | 13.74575311 | 22.221792   | 2.51E-08    | 0.755697989 | Up |
| ENSG00000117899 | MESDC2    | 1187  | 1989  | 20.2566     | 33.628609   | 1.73E-13    | 0.756034603 | Up |
| ENSG00000004139 | SARM1     | 126   | 213   | 1.602730001 | 1.703080119 | 0.012336092 | 0.763968122 | Up |

|                 |                  |      |       |             |             |             |             |    |
|-----------------|------------------|------|-------|-------------|-------------|-------------|-------------|----|
| ENSG00000272752 | G3L5P-PVRIG2P-PI | 657  | 1109  | 19.70516761 | 34.775655   | 8.94E-11    | 0.766141171 | Up |
| ENSG00000170684 | ZNF296           | 143  | 242   | 4.488413327 | 6.892508025 | 0.004072042 | 0.766153426 | Up |
| ENSG00000116717 | GADD45A          | 770  | 1302  | 24.91838565 | 42.60221837 | 9.42E-12    | 0.768794554 | Up |
| ENSG00000119508 | NR4A3            | 430  | 732   | 4.371061116 | 7.304097187 | 1.03E-08    | 0.777794192 | Up |
| ENSG00000143507 | DUSP10           | 108  | 185   | 2.152675    | 3.691506    | 0.025212448 | 0.782034339 | Up |
| ENSG00000173530 | TNFRSF10D        | 142  | 245   | 2.273981838 | 4.14478     | 0.001825225 | 0.793890466 | Up |
| ENSG00000197136 | PCNX3            | 1561 | 2693  | 9.67382     | 16.9708     | 2.22E-16    | 0.798171902 | Up |
| ENSG00000243716 | NPIP5            | 197  | 341   | 7.40986258  | 8.514922519 | 5.21E-05    | 0.799915048 | Up |
| ENSG00000139438 | FAM222A          | 101  | 177   | 1.2454087   | 2.323793    | 0.018965089 | 0.814288941 | Up |
| ENSG00000101255 | TRIB3            | 2180 | 3804  | 42.41960731 | 75.13586    | 0           | 0.814738982 | Up |
| ENSG00000176907 | C8orf4           | 696  | 1225  | 24.4438     | 42.1737     | 2.78E-13    | 0.826470504 | Up |
| ENSG00000185022 | MAFF             | 840  | 1479  | 14.932963   | 26.633697   | 1.64E-14    | 0.827184099 | Up |
| ENSG00000221944 | TIGD1            | 120  | 213   | 2.57037     | 4.49051     | 0.002553411 | 0.833713289 | Up |
| ENSG00000125347 | IRF1             | 615  | 1088  | 15.70445546 | 26.84868633 | 9.77E-13    | 0.833725583 | Up |
| ENSG00000203812 | HIST2H2AA3       | 271  | 481   | 8.361453465 | 15.260583   | 1.69E-07    | 0.836959577 | Up |
| ENSG00000089597 | GANAB            | 6410 | 11366 | 86.42789937 | 153.4979207 | 0           | 0.83808985  | Up |
| ENSG00000196646 | ZNF136           | 108  | 193   | 1.847233767 | 2.846936836 | 0.005133337 | 0.842748011 | Up |
| ENSG00000129757 | CDKN1C           | 150  | 270   | 4.516198615 | 8.107176484 | 0.000129075 | 0.85499572  | Up |
| ENSG00000151617 | EDNRA            | 269  | 488   | 5.928135947 | 8.701468    | 3.35E-08    | 0.868397407 | Up |
| ENSG00000164877 | MICALL2          | 138  | 253   | 1.72265774  | 3.312919982 | 0.000129103 | 0.88092828  | Up |
| ENSG00000185864 | NPIP4            | 75   | 138   | 1.704362917 | 2.301808739 | 0.039308097 | 0.881626335 | Up |
| ENSG00000186487 | MYT1L            | 72   | 133   | 1.24431911  | 2.327806014 | 0.04757059  | 0.886820693 | Up |
| ENSG00000113739 | STC2             | 1068 | 1982  | 11.083768   | 19.99858    | 0           | 0.903205831 | Up |
| ENSG00000167460 | TPM4             | 8198 | 15238 | 147.5400579 | 273.885375  | 0           | 0.906110568 | Up |
| ENSG00000139289 | PHLDA1           | 387  | 725   | 3.8184452   | 7.1438353   | 3.80E-12    | 0.915533879 | Up |
| ENSG00000182903 | ZNF721           | 162  | 305   | 4.910638741 | 4.308503104 | 3.82E-06    | 0.919929533 | Up |
| ENSG00000169105 | CHST14           | 534  | 1010  | 9.477341271 | 19.48383086 | 2.78E-15    | 0.929860929 | Up |
| ENSG00000091986 | CCDC80           | 329  | 625   | 4.282630283 | 6.232947615 | 1.79E-11    | 0.935269125 | Up |
| ENSG00000060491 | OGFR             | 4060 | 7758  | 58.2187915  | 115.430097  | 0           | 0.945885115 | Up |
| ENSG00000266202 | RP1-66C13.4      | 124  | 238   | 5.61992189  | 9.051273666 | 4.39E-05    | 0.946154743 | Up |
| ENSG00000196843 | ARID5A           | 94   | 181   | 1.8936943   | 3.609910001 | 0.00096039  | 0.948756312 | Up |
| ENSG00000155090 | KLF10            | 592  | 1135  | 10.142639   | 19.227346   | 0           | 0.949563478 | Up |
| ENSG00000175197 | DDIT3            | 402  | 774   | 23.758773   | 45.90318    | 8.86E-14    | 0.95504035  | Up |



|                 |               |      |      |             |             |             |             |    |
|-----------------|---------------|------|------|-------------|-------------|-------------|-------------|----|
| ENSG00000153531 | ADPRHL1       | 100  | 194  | 3.22215617  | 6.471963197 | 0.000349719 | 0.959991567 | Up |
| ENSG00000139174 | PRICKLE1      | 80   | 156  | 1.031110865 | 2.145490059 | 0.003097052 | 0.965391988 | Up |
| ENSG00000165806 | CASP7         | 516  | 1005 | 12.14463565 | 22.93923881 | 1.11E-16    | 0.972071018 | Up |
| ENSG00000279765 | RP11-437B10.1 | 2190 | 4335 | 33.61594888 | 52.00614863 | 0           | 0.996602117 | Up |
| ENSG00000185338 | SOCS1         | 58   | 116  | 2.79382     | 5.75056     | 0.025811572 | 0.997840608 | Up |
| ENSG00000166897 | ELFN2         | 158  | 316  | 0.75909175  | 1.5473307   | 1.12E-07    | 1.00667511  | Up |
| ENSG00000196787 | HIST1H2AG     | 183  | 373  | 4.54023     | 9.19789     | 2.13E-09    | 1.034630995 | Up |
| ENSG00000180425 | C11orf71      | 53   | 109  | 1.99639     | 4.02377     | 0.024713538 | 1.036383904 | Up |
| ENSG00000148339 | SLC25A25      | 742  | 1514 | 10.0064279  | 20.25316277 | 0           | 1.039614794 | Up |
| ENSG00000276903 | HIST1H2AL     | 117  | 240  | 4.354452    | 11.736411   | 2.64E-06    | 1.041219467 | Up |
| ENSG00000255150 | EID3          | 78   | 161  | 2.77461     | 5.78885     | 0.000434696 | 1.046593688 | Up |
| ENSG0000023608  | SNAPC1        | 553  | 1136 | 14.01357458 | 28.154995   | 0           | 1.048955672 | Up |
| ENSG00000130956 | HABP4         | 183  | 378  | 3.119947629 | 6.481320874 | 7.43E-10    | 1.05378415  | Up |
| ENSG00000177721 | ANXA2R        | 104  | 217  | 4.54325     | 7.69188     | 5.93E-06    | 1.064786722 | Up |
| ENSG00000136244 | IL6           | 121  | 257  | 6.384780309 | 13.36440905 | 1.95E-07    | 1.091467603 | Up |
| ENSG00000164683 | HEY1          | 63   | 135  | 1.722898901 | 3.145969769 | 0.001169507 | 1.097622904 | Up |
| ENSG00000188818 | ZDHC11        | 46   | 99   | 0.994350188 | 2.385994945 | 0.023507446 | 1.098806436 | Up |
| ENSG00000144655 | CSRNP1        | 447  | 956  | 6.508850247 | 14.00500997 | 0           | 1.106648111 | Up |
| ENSG00000143367 | TUFT1         | 508  | 1092 | 8.36096098  | 17.64873763 | 0           | 1.114212383 | Up |
| ENSG00000138061 | CYP1B1        | 70   | 152  | 0.770615652 | 1.624285371 | 0.000199195 | 1.117952789 | Up |
| ENSG00000185947 | ZNF267        | 75   | 163  | 1.306334    | 2.932719    | 7.88E-05    | 1.120037664 | Up |
| ENSG00000143333 | RGS16         | 49   | 111  | 0.977213    | 2.19773     | 0.002697992 | 1.173091883 | Up |
| ENSG00000099860 | GADD45B       | 419  | 942  | 14.655497   | 31.298652   | 0           | 1.178470091 | Up |
| ENSG00000123095 | BHLHE41       | 47   | 107  | 0.587395    | 1.281519047 | 0.00358866  | 1.179415781 | Up |
| ENSG00000139269 | INHBE         | 95   | 217  | 1.87958778  | 4.384616097 | 1.63E-07    | 1.193895343 | Up |
| ENSG00000171368 | TPPP          | 111  | 257  | 0.779508    | 1.82091     | 3.58E-09    | 1.214707044 | Up |
| ENSG00000168675 | LDLRAD4       | 34   | 80   | 0.300046483 | 1.431352036 | 0.032362285 | 1.219110797 | Up |
| ENSG00000197714 | ZNF460        | 33   | 79   | 0.86988354  | 1.175920558 | 0.027506866 | 1.242873416 | Up |
| ENSG00000068078 | FGFR3         | 123  | 295  | 1.942379611 | 3.550054426 | 2.92E-11    | 1.266169971 | Up |
| ENSG00000270276 | HIST2H4B      | 49   | 120  | 2.84581     | 7.04358     | 0.000173417 | 1.284479356 | Up |
| ENSG00000162772 | ATF3          | 534  | 1302 | 12.91075719 | 35.53113292 | 0           | 1.295874643 | Up |
| ENSG00000204611 | ZNF616        | 58   | 143  | 0.954966473 | 3.760728734 | 1.19E-05    | 1.297109254 | Up |
| ENSG00000278828 | HIST1H3H      | 236  | 584  | 8.33656     | 22.16958    | 0           | 1.314909988 | Up |

|                 |           |     |      |             |             |             |             |    |
|-----------------|-----------|-----|------|-------------|-------------|-------------|-------------|----|
| ENSG00000224420 | ADM5      | 32  | 83   | 1.01147     | 2.64888     | 0.004447048 | 1.356049587 | Up |
| ENSG00000115844 | DLX2      | 78  | 200  | 1.572100621 | 4.109981041 | 7.56E-09    | 1.357577355 | Up |
| ENSG00000169330 | KIAA1024  | 41  | 106  | 0.324699    | 0.821652    | 0.000253689 | 1.358075739 | Up |
| ENSG00000128965 | CHAC1     | 175 | 450  | 5.954213994 | 15.39714313 | 0           | 1.368719085 | Up |
| ENSG00000087074 | PPP1R15A  | 746 | 1924 | 12.8182095  | 33.28929495 | 0           | 1.377385216 | Up |
| ENSG00000132801 | ZSWIM3    | 47  | 123  | 0.873826791 | 2.239715    | 2.33E-05    | 1.378507194 | Up |
| ENSG00000157601 | MX1       | 108 | 281  | 1.208725781 | 3.300951765 | 1.24E-12    | 1.382093673 | Up |
| ENSG00000176809 | LRR37A3   | 55  | 144  | 0.496856365 | 1.384931134 | 1.84E-06    | 1.38219558  | Up |
| ENSG00000107742 | SPOCK2    | 32  | 86   | 0.335977089 | 0.757991032 | 0.001582333 | 1.406600993 | Up |
| ENSG00000241058 | NSUN6     | 70  | 188  | 1.810892378 | 4.739264366 | 4.66E-09    | 1.422580763 | Up |
| ENSG00000124257 | NEURL2    | 24  | 66   | 0.980181    | 2.75451     | 0.018661262 | 1.429020976 | Up |
| ENSG00000276410 | HIST1H2BB | 57  | 157  | 4.77985     | 9.581417    | 7.85E-08    | 1.455458038 | Up |
| ENSG00000131471 | AOC3      | 34  | 96   | 0.472987083 | 1.546439093 | 0.000148851 | 1.478803218 | Up |
| ENSG00000130487 | KLHDC7B   | 23  | 66   | 0.355876    | 1.02938     | 0.010293211 | 1.487590481 | Up |
| ENSG00000278677 | HIST1H2AM | 102 | 287  | 6.460322    | 13.56666    | 9.55E-15    | 1.494033275 | Up |
| ENSG00000105499 | PLA2G4C   | 56  | 159  | 1.44922243  | 4.62845579  | 2.26E-08    | 1.498622943 | Up |
| ENSG00000172345 | STARD5    | 21  | 61   | 0.228943    | 0.6611403   | 0.019205044 | 1.5007108   | Up |
| ENSG00000184730 | APOBR     | 24  | 70   | 0.225087032 | 0.663083106 | 0.004323339 | 1.512526014 | Up |
| ENSG00000171951 | SCG2      | 38  | 110  | 0.684349799 | 1.946553107 | 1.13E-05    | 1.517521524 | Up |
| ENSG00000125266 | EFNB2     | 38  | 110  | 0.43725     | 1.24717     | 1.13E-05    | 1.517521524 | Up |
| ENSG00000125740 | FOSB      | 36  | 108  | 0.465548215 | 1.504450227 | 6.64E-06    | 1.566998793 | Up |
| ENSG00000162733 | DDR2      | 20  | 61   | 0.22642069  | 0.63025274  | 0.010174874 | 1.567404301 | Up |
| ENSG00000205085 | FAM71F2   | 47  | 146  | 0.516323315 | 1.682602193 | 7.97E-09    | 1.623753597 | Up |
| ENSG00000260458 | KCNJ18    | 18  | 60   | 0.387511    | 1.30597     | 0.003819793 | 1.687409534 | Up |
| ENSG00000148677 | ANKRD1    | 92  | 298  | 2.38186     | 7.61802     | 0           | 1.695224504 | Up |
| ENSG00000125508 | SRMS      | 35  | 120  | 0.566875    | 1.6181845   | 3.48E-08    | 1.756894221 | Up |
| ENSG00000102890 | ELMO3     | 22  | 77   | 0.450876738 | 1.560620998 | 6.82E-05    | 1.767569015 | Up |
| ENSG00000147174 | ACRC      | 18  | 64   | 0.286559513 | 1.017931254 | 0.000724741 | 1.778856611 | Up |
| ENSG00000179148 | ALOXE3    | 15  | 54   | 0.209347665 | 0.7530314   | 0.004947469 | 1.784369291 | Up |
| ENSG00000145506 | NKD2      | 40  | 142  | 0.7748856   | 2.81066     | 2.62E-10    | 1.810704157 | Up |
| ENSG00000177606 | JUN       | 400 | 1404 | 5.03755     | 17.9893     | 0           | 1.820412067 | Up |
| ENSG00000105963 | ADAP1     | 18  | 67   | 0.396290075 | 1.511028123 | 0.000201905 | 1.843828236 | Up |
| ENSG00000159753 | CARMIL2   | 30  | 110  | 0.302343094 | 1.044149951 | 4.26E-08    | 1.847438284 | Up |

|                 |           |     |     |             |             |             |             |    |
|-----------------|-----------|-----|-----|-------------|-------------|-------------|-------------|----|
| ENSG00000203814 | HIST2H2BF | 27  | 100 | 1.797673    | 4.893552    | 2.44E-07    | 1.857564685 | Up |
| ENSG00000100918 | REC8      | 31  | 116 | 0.72546     | 2.178172001 | 8.05E-09    | 1.877695703 | Up |
| ENSG00000010319 | SEMA3G    | 17  | 65  | 0.155908686 | 0.577892557 | 0.000212208 | 1.878275321 | Up |
| ENSG00000128564 | VGF       | 40  | 151 | 0.628349    | 2.398183115 | 7.47E-12    | 1.898684974 | Up |
| ENSG00000277224 | HIST1H2BF | 32  | 122 | 1.11627     | 3.35666     | 1.53E-09    | 1.905559948 | Up |
| ENSG00000113070 | HBEGF     | 66  | 249 | 1.38756     | 5.18068     | 0           | 1.909381383 | Up |
| ENSG00000124216 | SNAI1     | 29  | 113 | 0.932194    | 3.60198     | 5.47E-09    | 1.932965631 | Up |
| ENSG00000100156 | SLC16A8   | 9   | 39  | 0.258916974 | 1.016020894 | 0.026574156 | 1.996993567 | Up |
| ENSG00000171385 | KCND3     | 18  | 76  | 0.1943928   | 0.485574112 | 3.83E-06    | 2.022839375 | Up |
| ENSG00000137877 | SPTBN5    | 15  | 64  | 0.0464566   | 0.2006405   | 5.86E-05    | 2.024868934 | Up |
| ENSG00000106948 | AKNA      | 33  | 137 | 0.248366157 | 1.909230508 | 6.82E-12    | 2.028513976 | Up |
| ENSG00000117245 | KIF17     | 10  | 44  | 0.121517959 | 0.534410672 | 0.006407008 | 2.030665903 | Up |
| ENSG00000276966 | HIST1H4E  | 22  | 94  | 8.27535     | 14.71851    | 4.58E-08    | 2.051605112 | Up |
| ENSG00000135436 | FAM186B   | 8   | 37  | 0.0868631   | 0.467604    | 0.027167825 | 2.073092456 | Up |
| ENSG00000128165 | ADM2      | 83  | 369 | 0.788135    | 3.533811    | 0           | 2.149103833 | Up |
| ENSG00000273802 | HIST1H2BG | 22  | 106 | 1.313513    | 2.93829     | 2.02E-10    | 2.223001717 | Up |
| ENSG00000126562 | WNK4      | 17  | 85  | 0.1935501   | 0.973967    | 2.27E-08    | 2.259505184 | Up |
| ENSG00000130653 | PNPLA7    | 7   | 39  | 0.116742091 | 0.521297373 | 0.003664591 | 2.314105433 | Up |
| ENSG00000119630 | PGF       | 9   | 49  | 0.228422754 | 1.273492066 | 0.0002037   | 2.318013449 | Up |
| ENSG00000130518 | KIAA1683  | 20  | 107 | 0.30404988  | 1.190053653 | 1.59E-11    | 2.366846107 | Up |
| ENSG00000168062 | BATF2     | 151 | 798 | 4.013191588 | 18.29846698 | 0           | 2.404940061 | Up |
| ENSG00000086730 | LAT2      | 5   | 33  | 0.121219653 | 1.12429011  | 0.008480457 | 2.487487079 | Up |
| ENSG00000196890 | HIST3H2BB | 14  | 85  | 0.346249    | 2.11379     | 8.23E-10    | 2.520384254 | Up |
| ENSG00000197406 | DIO3      | 11  | 72  | 0.270989    | 1.78581     | 1.62E-08    | 2.603021775 | Up |
| ENSG00000101306 | MYLK2     | 7   | 48  | 0.103165439 | 0.683046115 | 3.25E-05    | 2.60605313  | Up |
| ENSG00000204103 | MAFB      | 52  | 329 | 0.73581     | 4.68517     | 0           | 2.647142137 | Up |
| ENSG00000146592 | CREB5     | 4   | 31  | 0.05243474  | 0.424118845 | 0.007132088 | 2.657030744 | Up |
| ENSG00000144488 | ESPNL     | 6   | 44  | 0.071388795 | 0.490372166 | 7.74E-05    | 2.672740674 | Up |
| ENSG00000275713 | HIST1H2BH | 4   | 32  | 0.115833636 | 7.882844    | 0.004081337 | 2.701253032 | Up |
| ENSG00000105550 | FGF21     | 3   | 26  | 0.199395778 | 1.643491    | 0.030372662 | 2.725406054 | Up |
| ENSG00000128917 | DLL4      | 15  | 124 | 0.19659     | 1.62998     | 0           | 2.966942217 | Up |
| ENSG00000169085 | C8orf46   | 3   | 35  | 0.056730271 | 0.652855946 | 0.000160484 | 3.138763773 | Up |
| ENSG00000160161 | CILP2     | 6   | 62  | 0.05976379  | 0.629432874 | 3.25E-09    | 3.157013713 | Up |

|                 |           |    |     |             |             |             |             |    |
|-----------------|-----------|----|-----|-------------|-------------|-------------|-------------|----|
| ENSG00000164362 | TERT      | 4  | 45  | 0.054935414 | 0.48626442  | 2.29E-06    | 3.178865989 | Up |
| ENSG00000080031 | PTPRH     | 2  | 28  | 0.025403186 | 0.30476201  | 0.002002481 | 3.227394735 | Up |
| ENSG00000205710 | C17orf107 | 2  | 32  | 0.02777776  | 0.542094    | 0.000171462 | 3.413049587 | Up |
| ENSG00000134198 | TSPAN2    | 1  | 22  | 0.020644931 | 0.560597621 | 0.013359649 | 3.448712664 | Up |
| ENSG00000140488 | CELF6     | 1  | 23  | 0.028636443 | 0.383664054 | 0.007089726 | 3.509784975 | Up |
| ENSG00000135702 | CHST5     | 1  | 24  | 0.024782174 | 0.5932463   | 0.003747114 | 3.568376624 | Up |
| ENSG00000118160 | SLC8A2    | 5  | 92  | 0.079155744 | 1.165762726 | 0           | 3.935792731 | Up |
| ENSG00000198576 | ARC       | 16 | 264 | 0.220636    | 3.68856     | 0           | 3.963487539 | Up |
| ENSG00000149781 | FERMT3    | 2  | 70  | 0.089554185 | 1.767994961 | 8.10E-15    | 4.515456497 | Up |
| ENSG00000115850 | LCT       | 0  | 27  | 0           | 0.204913    | 4.45E-05    | 4.642302508 | Up |
| ENSG00000010295 | IFFO1     | 0  | 38  | 0           | 0.614932659 | 2.64E-08    | 5.118521953 | Up |
| ENSG00000185668 | POU3F1    | 0  | 46  | 0           | 0.713324    | 1.24E-10    | 5.386915915 | Up |
| ENSG00000074181 | NOTCH3    | 4  | 219 | 0.036083126 | 1.286479    | 0           | 5.433536957 | Up |

**Supplementary Table S5: GO enrichment of 233 DEGs between HOXD-AS2 knockdown and control Bel-7402 cells**

| Term                                                                                         | Count | %          | P-Value   | Genes                                                                                                                                                                |
|----------------------------------------------------------------------------------------------|-------|------------|-----------|----------------------------------------------------------------------------------------------------------------------------------------------------------------------|
| GO:0006334~nucleosome assembly                                                               | 13    | 5.60344828 | 2.04E-08  | HIST1H2BB, BRD2, HIST1H4K, HIST1H2BD, HIST1H2BF, HIST1H2BG, HIST2H2BF, HIST1H2BH, SMYD3, HIST1H4E, HIST3H2BB, HIST1H3H, HIST2H4B                                     |
| GO:0048661~positive regulation of smooth muscle cell proliferation                           | 7     | 3.01724138 | 8.20E-05  | NOTCH3, CDH13, IL6, JUN, TGFB2, HBEGF, NR4A3                                                                                                                         |
| GO:0061314~Notch signaling involved in heart development                                     | 4     | 1.72413793 | 1.37E-04  | NOTCH2, HEY1, DLL4, SNAI1                                                                                                                                            |
| GO:0045746~negative regulation of Notch signaling pathway                                    | 5     | 2.15517241 | 3.81E-04  | DLX2, HEY1, CHAC1, DLL4, C8ORF4                                                                                                                                      |
| GO:0070059~intrinsic apoptotic signaling pathway in response to endoplasmic reticulum stress | 5     | 2.15517241 | 6.33E-04  | CHAC1, TRIB3, PMAIP1, PPP1R15A, DDIT3                                                                                                                                |
| GO:0045944~positive regulation of transcription from RNA polymerase II promoter              | 25    | 10.7758621 | 7.42E-04  | AKNA, HELZ2, ANKRD1, FOS, HEY1, POU3F1, SERTAD1, MAFF, IL6, MAFB, CEBPG, SMYD3, TEAD2, NR4A3, FOSB, DDIT3, NOTCH3, DLX2, CDH13, ADRB2, ATF3, CSRN1P, JUN, IRF1, KLF4 |
| GO:0006915~apoptotic process                                                                 | 17    | 7.32758621 | 0.0014111 | NUAK2, PTPRH, TGFB2, PMAIP1, ELMO3, DDIT3, NOTCH2, CASP7, CSRN1P, C8ORF4, IRF1, MX1, GADD45B, IGFBP3, GADD45A, PPP1R15A, PHLD41                                      |
| GO:0006342~chromatin silencing                                                               | 5     | 2.15517241 | 0.0020595 | HIST2H2AA3, HIST1H2AC, HIST1H2AG, HIST1H2AM, HIST1H2AL                                                                                                               |
| GO:0003416~endochondral bone growth                                                          | 3     | 1.29310345 | 0.0020923 | FGFR3, BNC2, DDR2                                                                                                                                                    |
| GO:0035914~skeletal muscle cell differentiation                                              | 5     | 2.15517241 | 0.0028214 | MAFF, FOS, ATF3, MYLK2, ANKRD1                                                                                                                                       |
| GO:0032200~telomere organization                                                             | 4     | 1.72413793 | 0.0040551 | HIST1H4K, HIST1H4E, HIST1H3H, HIST2H4B                                                                                                                               |
| GO:0000122~negative regulation of transcription from RNA polymerase II promoter              | 18    | 7.5862069  | 0.0062794 | KLF10, ZNF296, TRIB3, ANKRD1, NR4A3, FOSB, SNAI1, DDIT3, NOTCH3, CDKN1C, DLX2, ATF3, HEY1, PCGF6, DLL4, ZNF136, BHLHE41, KLF4                                        |
| GO:0006335~DNA replication-dependent nucleosome assembly                                     | 4     | 1.72413793 | 0.0065805 | HIST1H4K, HIST1H4E, HIST1H3H, HIST2H4B                                                                                                                               |
| GO:0006469~negative regulation of protein kinase activity                                    | 6     | 2.5862069  | 0.0068834 | IL6, SOCS1, SMYD3, TRIB3, GADD45B, GADD45A                                                                                                                           |
| GO:0009409~response to cold                                                                  | 4     | 1.72413793 | 0.009146  | FOS, IL6, ADRB2, VGF                                                                                                                                                 |
| GO:0006366~transcription from RNA polymerase II promoter                                     | 14    | 6.03448276 | 0.0093151 | AKNA, MAFF, MAFB, CEBPG, CREB5, FOSB, FOS, DLX2, ATF3, JUN, ZNF136, CSRN1P, IRF1, KLF4                                                                               |
| GO:0000183~chromatin silencing at rDNA                                                       | 4     | 1.72413793 | 0.0098662 | HIST1H4K, HIST1H4E, HIST1H3H, HIST2H4B                                                                                                                               |
| GO:0071260~cellular response to mechanical stimulus                                          | 5     | 2.15517241 | 0.0105485 | GCLC, IRF1, HAPB4, ANKRD1, GADD45A                                                                                                                                   |
| GO:0045444~fat cell differentiation                                                          | 5     | 2.15517241 | 0.0116002 | INHBB, ALOXE3, SOCS1, NR4A3, KLF4                                                                                                                                    |
| GO:0007219~Notch signaling pathway                                                           | 6     | 2.5862069  | 0.0126751 | NOTCH3, NOTCH2, HEY1, CHAC1, DLL4, TGFB2                                                                                                                             |
| GO:0051290~protein heterotrimerization                                                       | 4     | 1.72413793 | 0.0139535 | HIST1H4K, HIST1H4E, HIST1H3H, HIST2H4B                                                                                                                               |
| GO:1904837~beta-catenin-TCF complex assembly                                                 | 4     | 1.72413793 | 0.0148696 | HIST1H4K, HIST1H4E, TERT, HIST2H4B                                                                                                                                   |
| GO:0007568~aging                                                                             | 7     | 3.01724138 | 0.014894  | CDKN1C, FOS, IL6, GCLC, CASP7, JUN, TGFB2                                                                                                                            |
| GO:0035994~response to muscle stretch                                                        | 3     | 1.29310345 | 0.015466  | FOS, JUN, ANKRD1                                                                                                                                                     |
| GO:0032870~cellular response to hormone stimulus                                             | 4     | 1.72413793 | 0.0168019 | FOS, PGF, JUN, FOSB                                                                                                                                                  |
| GO:0030968~endoplasmic reticulum unfolded protein response                                   | 4     | 1.72413793 | 0.0168019 | CTH, STC2, FGF21, PPP1R15A                                                                                                                                           |
| GO:0045892~negative regulation of transcription, DNA-templated                               | 13    | 5.60344828 | 0.0177924 | GCLC, KLF10, ARID5A, TRIB3, DDIT3, CDKN1C, PRICKLE1, HEY1, PCGF6, JUN, IRF1, BHLHE41, KLF4                                                                           |
| GO:0051591~response to cAMP                                                                  | 4     | 1.72413793 | 0.0178182 | FOS, JUN, FOSB, VGF                                                                                                                                                  |
| GO:0045653~negative regulation of megakaryocyte differentiation                              | 3     | 1.29310345 | 0.0194116 | HIST1H4K, HIST1H4E, HIST2H4B                                                                                                                                         |
| GO:0008285~negative regulation of cell proliferation                                         | 11    | 4.74137931 | 0.0218176 | NOTCH2, CDH13, HIST1H2AC, IL6, CYP1B1, JUN, DLL4, KLF10, IRF1, IGFBP3, KLF4                                                                                          |
| GO:0045814~negative regulation of gene expression, epigenetic                                | 4     | 1.72413793 | 0.0222197 | HIST1H4K, HIST1H4E, HIST1H3H, HIST2H4B                                                                                                                               |
| GO:0071277~cellular response to calcium ion                                                  | 4     | 1.72413793 | 0.0234043 | AKR1C3, FOS, JUN, FOSB                                                                                                                                               |
| GO:1902895~positive regulation of pri-miRNA transcription from RNA polymerase II promoter    | 3     | 1.29310345 | 0.0237306 | FOS, JUN, TERT                                                                                                                                                       |
| GO:0030335~positive regulation of cell migration                                             | 7     | 3.01724138 | 0.024035  | CDH13, SEMA3G, CARMIL2, FERMT3, CEMIP, HBEGF, SNAI1                                                                                                                  |
| GO:0007050~cell cycle arrest                                                                 | 6     | 2.5862069  | 0.0278896 | CDKN1C, NOTCH2, IRF1, GADD45A, PPP1R15A, DDIT3                                                                                                                       |
| GO:0016233~telomere capping                                                                  | 3     | 1.29310345 | 0.030866  | HIST1H4K, HIST1H4E, HIST2H4B                                                                                                                                         |
| GO:0009612~response to mechanical stimulus                                                   | 4     | 1.72413793 | 0.03409   | INHBB, JUN, TGFB2, FOSB                                                                                                                                              |
| GO:0019369~arachidonic acid metabolic process                                                | 3     | 1.29310345 | 0.0360331 | CYP1B1, ALOXE3, PLA2G4C                                                                                                                                              |
| GO:0002227~innate immune response in mucosa                                                  | 3     | 1.29310345 | 0.0360331 | HIST1H2BD, HIST1H2BF, HIST1H2BG                                                                                                                                      |
| GO:0045815~positive regulation of gene expression, epigenetic                                | 4     | 1.72413793 | 0.0386458 | HIST1H4K, HIST1H4E, HIST1H3H, HIST2H4B                                                                                                                               |
| GO:0060395~SMAD protein signal transduction                                                  | 4     | 1.72413793 | 0.0386458 | INHBB, FOS, INHBE, JUN                                                                                                                                               |
| GO:0006336~DNA replication-independent nucleosome assembly                                   | 3     | 1.29310345 | 0.0387328 | HIST1H4K, HIST1H4E, HIST2H4B                                                                                                                                         |
| GO:0006357~regulation of transcription from RNA polymerase II promoter                       | 11    | 4.74137931 | 0.0410987 | MAFF, FOS, BRD2, ATF3, BATF2, MAFB, SMARCD3, CEBPG, ARID5A, FOSB, ZSCAN29                                                                                            |
| GO:0032436~positive regulation of proteasomal ubiquitin-dependent protein catabolic process  | 4     | 1.72413793 | 0.0418465 | GCLC, NKD2, PRICKLE1, TRIB3                                                                                                                                          |
| GO:2000352~negative regulation of endothelial cell apoptotic process                         | 3     | 1.29310345 | 0.0443536 | FGF21, TERT, SCG2                                                                                                                                                    |
| GO:0001569~patterning of blood vessels                                                       | 3     | 1.29310345 | 0.0443536 | EDNRA, DLL4, TGFB2                                                                                                                                                   |
| GO:0071395~cellular response to jasmonic acid stimulus                                       | 2     | 0.86206897 | 0.047261  | AKR1C3, AKR1C2                                                                                                                                                       |
| GO:0006534~cysteine metabolic process                                                        | 2     | 0.86206897 | 0.047261  | CTH, GCLC                                                                                                                                                            |
| GO:0043542~endothelial cell migration                                                        | 3     | 1.29310345 | 0.0472703 | CDH13, CYP1B1, SCG2                                                                                                                                                  |
| GO:0048662~negative regulation of smooth muscle cell proliferation                           | 3     | 1.29310345 | 0.0472703 | NPR3, IGFBP3, KLF4                                                                                                                                                   |
| GO:0045893~positive regulation of transcription, DNA-templated                               | 12    | 5.17241379 | 0.0473831 | CDKN1C, FOS, IL6, SMARCD3, PCID2, JUN, IRF1, CREB5, POU3F1, SNAI1, KLF4, DDIT3                                                                                       |

**Supplementary Table S6: KEGG pathway enrichment of 233 DEGs between HOXD-AS2 knockdown and control Bel-7402 cells**

| KEGG Term                             | Count | P-Value     | Genes                                                                                                                                                                                    |
|---------------------------------------|-------|-------------|------------------------------------------------------------------------------------------------------------------------------------------------------------------------------------------|
| hsa05322:Systemic lupus erythematosus | 17    | 9.21E-12    | HIST2H2AA3, HIST1H2BB, HIST1H2AC, HIST1H2BD, HIST1H4K, HIST1H2BF, HIST1H2AG, HIST1H2BG, HIST1H2BH, TRIM21, HIST2H4B, HIST2H2BF, HIST1H4E, HIST3H2BB, HIST1H2AM, HIST1H2AL, HIST1H3H      |
| hsa05034:Alcoholism                   | 18    | 6.66E-11    | HIST2H2AA3, HIST1H2BB, HIST1H2AC, HIST1H2BD, HIST1H4K, HIST1H2BF, HIST1H2AG, HIST1H2BG, HIST1H2BH, CREB5, FOSB, HIST2H4B, HIST2H2BF, HIST1H4E, HIST3H2BB, HIST1H2AM, HIST1H2AL, HIST1H3H |
| hsa05203:Viral carcinogenesis         | 13    | 1.12E-05    | HIST1H2BB, HIST1H4K, HIST1H2BD, HIST1H2BF, HIST1H2BG, HIST2H2BF, JUN, HIST1H2BH, HIST1H4E, CREB5, PMAIP1, HIST3H2BB, HIST2H4B                                                            |
| hsa04010:MAPK signaling pathway       | 10    | 0.005202369 | FOS, FGFR3, JUN, TGFBR2, DUSP10, FGF21, GADD45B, PLA2G4C, GADD45A, DDIT3                                                                                                                 |
| hsa05031:Amphetamine addiction        | 5     | 0.010254039 | FOS, ARC, JUN, CREB5, FOSB                                                                                                                                                               |
| hsa05133:Pertussis                    | 5     | 0.015844245 | FOS, IL6, CASP7, JUN, IRF1                                                                                                                                                               |
| hsa04668:TNF signaling pathway        | 5     | 0.049414139 | FOS, IL6, CASP7, JUN, CREB5                                                                                                                                                              |
